# Supplementary material for: Coupling Coordination and Spatiotemporal Dynamic Evolution between Agricultural Carbon Emissions and Agricultural Modernization in China 2010–2020
Source: MDPI journal article supplement (doi:10.3390/agriculture12111809), 2022-10-30
Supplement: s1 [file s1]

**Table S1.** Emission factors of different carbon emission sources.

| Carbon Emission                | Sources                    | Emission Factors                                           | Reference                  |
|--------------------------------|----------------------------|------------------------------------------------------------|----------------------------|
| Carbon emission from land use  | Agricultural fertilizer    | 0.8956 kg(C)/kg                                            | ORNL                       |
|                                | Pesticide                  | 4.9341 kg(C)/kg                                            | ORNL                       |
|                                | Agricultural plastic films | 5.18 kg(C)/kg                                              | IREEA                      |
|                                | Agricultural diesel oil    | 0.5927 kg(C)/kg                                            | IPCC                       |
|                                | Sowing                     | 266.48 kg(C)/hm <sup>2</sup>                               | CAB                        |
|                                | Irrigation                 | 3.126 kg(C)/hm <sup>2</sup>                                | Dubey                      |
| Carbon emission from farming   | <b>Crops</b>               | <b>N<sub>2</sub>O Emission Factors</b>                     | <b>Reference</b>           |
|                                | Rice                       | 17.33 kg(C)/hm <sup>2</sup>                                | Min & Hu (2012)            |
|                                | Wheat                      | 148.02 kg(C)/hm <sup>2</sup>                               |                            |
|                                | Soybeans                   | 55.6 kg(C)/hm <sup>2</sup>                                 |                            |
|                                | Maize                      | 182.83 kg(C)/hm <sup>2</sup>                               |                            |
|                                | Cotton                     | 34.69 kg(C)/hm <sup>2</sup>                                |                            |
|                                | Vegetables                 | 304 kg(C)/hm <sup>2</sup>                                  |                            |
|                                | <b>Crops</b>               | <b>CH<sub>4</sub> Emission Factors</b>                     | <b>Reference</b>           |
|                                | Rice                       | Appendix Table S2                                          | Wang, Liao, & Jiang (2020) |
|                                | <b>Crops</b>               | <b>Straw Burning Emission Factors</b>                      | <b>Reference</b>           |
|                                | Rice                       | 420.11 g(C)/kg                                             | Zheng, Ge, & Yu, (2022)    |
|                                | Wheat                      | 421.48 g(C)/kg                                             |                            |
|                                | Maize                      | 198.29 g(C)/kg                                             |                            |
| Carbon emission from livestock | <b>Ruminant Animal</b>     | <b>Emission Factors of Intestinal Fermentation</b>         | <b>References</b>          |
|                                | Cattle                     | 395.56 kg(C)/unit/year                                     | IPCC                       |
|                                | Horses                     | 122.76 kg(C)/unit/year                                     |                            |
|                                | Donkeys                    | 68.21 kg(C)/unit/year                                      |                            |
|                                | Mules                      | 68.21 kg(C)/unit/year                                      |                            |
|                                | Pig                        | 6.82 kg(C)/unit/year                                       |                            |
|                                | Goat                       | 34.11 kg(C)/unit/year                                      |                            |
|                                | Sheep                      | 32.11 kg(C)/unit/year                                      |                            |
|                                | Poultry                    | 0                                                          |                            |
|                                | <b>Ruminant Animal</b>     | <b>CH<sub>4</sub> Emission Factors of Manure Treatment</b> | <b>Reference</b>           |
|                                | Cattle                     | 24.55 kg(C)/unit/year                                      | IPCC                       |
|                                | Horses                     | 11.18 kg(C)/unit/year                                      |                            |
|                                | Donkeys                    | 6.14 kg(C)/unit/year                                       |                            |

|                    | Mules                                                         | 6.14 kg(C)/unit/year  |           |
|--------------------|---------------------------------------------------------------|-----------------------|-----------|
|                    | Pig                                                           | 27.28 kg(C)/unit/year |           |
|                    | Goat                                                          | 1.16 kg(C)/unit/year  |           |
|                    | Sheep                                                         | 1.02 kg(C)/unit/year  |           |
|                    | Poultry                                                       | 0.02 kg(C)/unit/year  |           |
| Ruminant<br>Animal | <i>N<sub>2</sub>O</i> Emission Factors of<br>Manure Treatment |                       | Reference |
| Cattle             | 96.76 kg(C)/unit/year                                         |                       |           |
| Horses             | 100.37 kg(C)/unit/year                                        |                       |           |
| Donkeys            | 100.37 kg(C)/unit/year                                        |                       |           |
| Mules              | 100.37 kg(C)/unit/year                                        |                       |           |
| Pig                | 38.27 kg(C)/unit/year                                         |                       | IPCC      |
| Goat               | 23.83 kg(C)/unit/year                                         |                       |           |
| Sheep              | 23.83 kg(C)/unit/year                                         |                       |           |
| Poultry            | 1.44 kg(C)/unit/year                                          |                       |           |

**Table S2.** Carbon emission factors of rice cultivation in different provinces (kg(C)/hm<sup>2</sup>).

| Province       | Emission Factors | Province  | Emission Factors | Province  | Emission Factors |
|----------------|------------------|-----------|------------------|-----------|------------------|
| Beijing        | 1009.37          | Zhejiang  | 2710.17          | Hainan    | 2925.61          |
| Tianjin        | 865.17           | Anhui     | 2429.26          | Chongqing | 1287.33          |
| Hebei          | 1167.05          | Fujian    | 2635.56          | Sichuan   | 1287.33          |
| Shanxi         | 504.00           | Jiangxi   | 3212.62          | Guizhou   | 1277.19          |
| Inner Mongolia | 679.83           | Shandong  | 1600.22          | Yunnan    | 436.22           |
| Liaoning       | 703.43           | Henan     | 1358.89          | Shaanxi   | 952.37           |
| Jilin          | 424.03           | Hubei     | 2910.39          | Gansu     | 519.96           |
| Heilongjiang   | 632.63           | Hunan     | 2665.25          | Qinghai   | 0                |
| Shanghai       | 2379.77          | Guangdong | 3138.01          | Ningxia   | 559.54           |
| Jiangsu        | 2466.56          | Guangxi   | 2774.12          | Xinjiang  | 800.87           |

**Table S3.** Coupling and coupling coordination of agricultural carbon emissions with agricultural modernization in 2010, 2015 and 2020.

| Province       | 2010  |       |       |       | 2015  |       |       |       | 2020  |       |       |       |
|----------------|-------|-------|-------|-------|-------|-------|-------|-------|-------|-------|-------|-------|
|                | C1    | D1    | C2    | D2    | C1    | D1    | C2    | D2    | C1    | D1    | C2    | D2    |
| Beijing        | 0.874 | 0.757 | 0.923 | 0.711 | 0.956 | 0.852 | 0.978 | 0.814 | 0.997 | 0.958 | 1.000 | 0.910 |
| Tianjin        | 0.511 | 0.515 | 0.580 | 0.478 | 0.762 | 0.669 | 0.847 | 0.612 | 0.928 | 0.810 | 0.993 | 0.705 |
| Hebei          | 0.952 | 0.617 | 0.908 | 0.659 | 0.995 | 0.677 | 0.975 | 0.721 | 0.999 | 0.738 | 0.998 | 0.742 |
| Shanxi         | 0.603 | 0.528 | 0.748 | 0.455 | 0.831 | 0.657 | 0.945 | 0.568 | 0.881 | 0.696 | 0.977 | 0.600 |
| Inner Mongolia | 0.998 | 0.747 | 0.977 | 0.804 | 0.999 | 0.749 | 0.993 | 0.813 | 0.997 | 0.767 | 0.998 | 0.828 |
| Liaoning       | 0.815 | 0.608 | 0.831 | 0.598 | 0.921 | 0.680 | 0.937 | 0.665 | 0.932 | 0.707 | 0.967 | 0.667 |
| Jilin          | 0.945 | 0.702 | 0.972 | 0.668 | 0.993 | 0.750 | 1.000 | 0.700 | 0.999 | 0.802 | 0.986 | 0.723 |
| Heilongjiang   | 0.995 | 0.736 | 0.981 | 0.701 | 0.936 | 0.738 | 0.915 | 0.717 | 0.937 | 0.770 | 0.904 | 0.735 |
| Shanghai       | 0.717 | 0.639 | 0.934 | 0.500 | 0.876 | 0.756 | 1.000 | 0.582 | 0.969 | 0.869 | 0.950 | 0.651 |
| Jiangsu        | 0.987 | 0.584 | 0.981 | 0.488 | 0.980 | 0.681 | 0.844 | 0.559 | 0.958 | 0.728 | 0.746 | 0.565 |
| Zhejiang       | 0.800 | 0.621 | 0.939 | 0.525 | 0.909 | 0.716 | 0.989 | 0.618 | 0.971 | 0.797 | 0.994 | 0.668 |
| Anhui          | 0.953 | 0.515 | 0.999 | 0.429 | 0.991 | 0.551 | 0.918 | 0.478 | 0.965 | 0.623 | 0.781 | 0.494 |
| Fujian         | 0.737 | 0.594 | 0.880 | 0.510 | 0.920 | 0.732 | 0.985 | 0.649 | 0.980 | 0.827 | 0.996 | 0.715 |
| Jiangxi        | 0.835 | 0.461 | 0.877 | 0.261 | 0.972 | 0.532 | 0.748 | 0.316 | 1.000 | 0.626 | 0.387 | 0.280 |
| Shandong       | 1.000 | 0.549 | 0.951 | 0.647 | 0.966 | 0.593 | 0.997 | 0.702 | 0.974 | 0.651 | 0.998 | 0.706 |
| Henan          | 0.795 | 0.358 | 0.946 | 0.603 | 0.308 | 0.252 | 0.997 | 0.659 | 0.786 | 0.492 | 0.991 | 0.660 |
| Hubei          | 0.852 | 0.494 | 0.915 | 0.457 | 0.992 | 0.576 | 0.999 | 0.531 | 0.999 | 0.679 | 0.935 | 0.577 |
| Hunan          | 1.000 | 0.398 | 0.994 | 0.373 | 0.909 | 0.418 | 0.927 | 0.428 | 0.877 | 0.516 | 0.820 | 0.484 |
| Guangdong      | 0.891 | 0.569 | 0.991 | 0.477 | 0.978 | 0.656 | 0.995 | 0.562 | 0.998 | 0.725 | 0.920 | 0.571 |
| Guangxi        | 0.722 | 0.475 | 0.831 | 0.425 | 0.895 | 0.572 | 0.956 | 0.524 | 0.983 | 0.687 | 0.998 | 0.607 |
| Hainan         | 0.700 | 0.609 | 0.863 | 0.514 | 0.894 | 0.749 | 0.983 | 0.646 | 0.979 | 0.868 | 0.988 | 0.724 |
| Chongqing      | 0.551 | 0.506 | 0.667 | 0.448 | 0.797 | 0.649 | 0.895 | 0.581 | 0.895 | 0.729 | 0.979 | 0.636 |
| Sichuan        | 0.838 | 0.462 | 0.744 | 0.509 | 0.976 | 0.554 | 0.917 | 0.613 | 0.999 | 0.640 | 0.988 | 0.674 |
| Guizhou        | 0.464 | 0.439 | 0.480 | 0.430 | 0.717 | 0.572 | 0.741 | 0.558 | 0.920 | 0.723 | 0.943 | 0.699 |
| Yunnan         | 0.878 | 0.609 | 0.847 | 0.631 | 0.933 | 0.633 | 0.897 | 0.664 | 0.993 | 0.718 | 0.978 | 0.754 |
| Shaanxi        | 0.624 | 0.530 | 0.673 | 0.505 | 0.822 | 0.643 | 0.856 | 0.619 | 0.936 | 0.741 | 0.963 | 0.709 |
| Gansu          | 0.460 | 0.436 | 0.442 | 0.445 | 0.812 | 0.617 | 0.783 | 0.636 | 0.960 | 0.756 | 0.949 | 0.771 |
| Qinghai        | 0.210 | 0.307 | 0.199 | 0.315 | 0.710 | 0.606 | 0.682 | 0.624 | 0.924 | 0.761 | 0.899 | 0.787 |
| Ningxia        | 0.716 | 0.629 | 0.783 | 0.587 | 0.841 | 0.712 | 0.894 | 0.669 | 0.942 | 0.806 | 0.969 | 0.767 |
| Xinjiang       | 0.972 | 0.749 | 0.947 | 0.784 | 0.999 | 0.803 | 0.993 | 0.870 | 0.990 | 0.832 | 0.999 | 0.912 |
| Average        | 0.780 | 0.558 | 0.827 | 0.531 | 0.886 | 0.645 | 0.920 | 0.623 | 0.956 | 0.735 | 0.933 | 0.677 |
